# Supplementary material for: Isolation and Characterization of Mannanase-Producing Bacteria for Potential Synbiotic Application in Shrimp Farming
Source: MDPI journal article supplement (doi:10.3390/ani12192583), 2022-09-27

**Figure S1.** Overview of experimental design to evaluate mannan oligosaccharides (MOS) from copra meal as shrimp feed supplements.

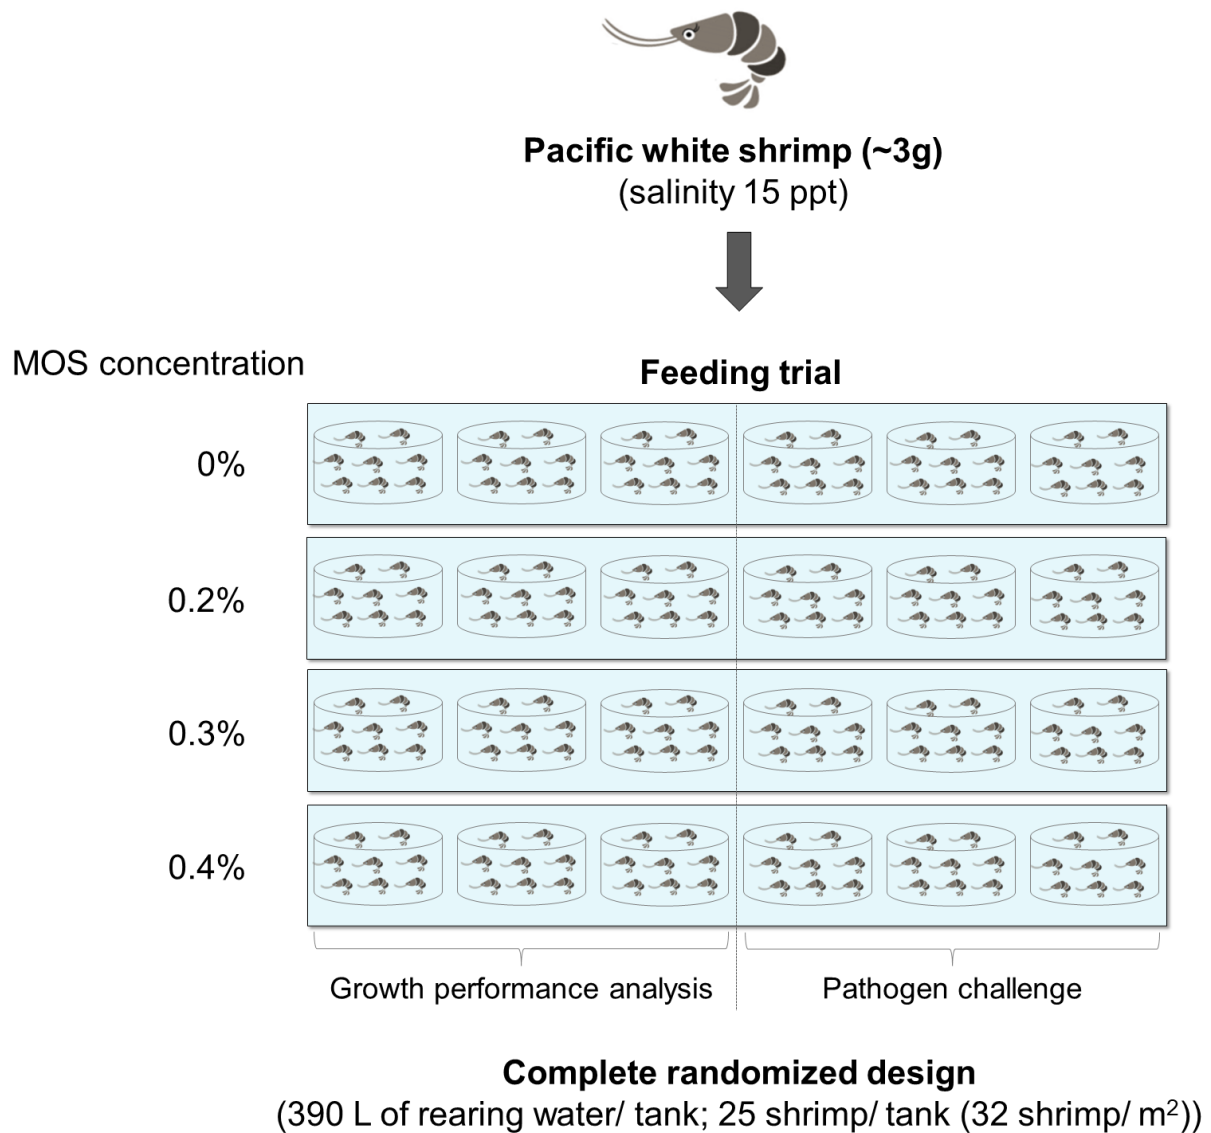

**Figure S2.** Growth performance analysis of shrimp fed with commercial diet supplemented with 0%, 0.2%, 0.3% and 0.4% MOS. (A) final weight, (B) average daily growth, and (C) feed conversion ratio. The error bar represents a standard deviation value.

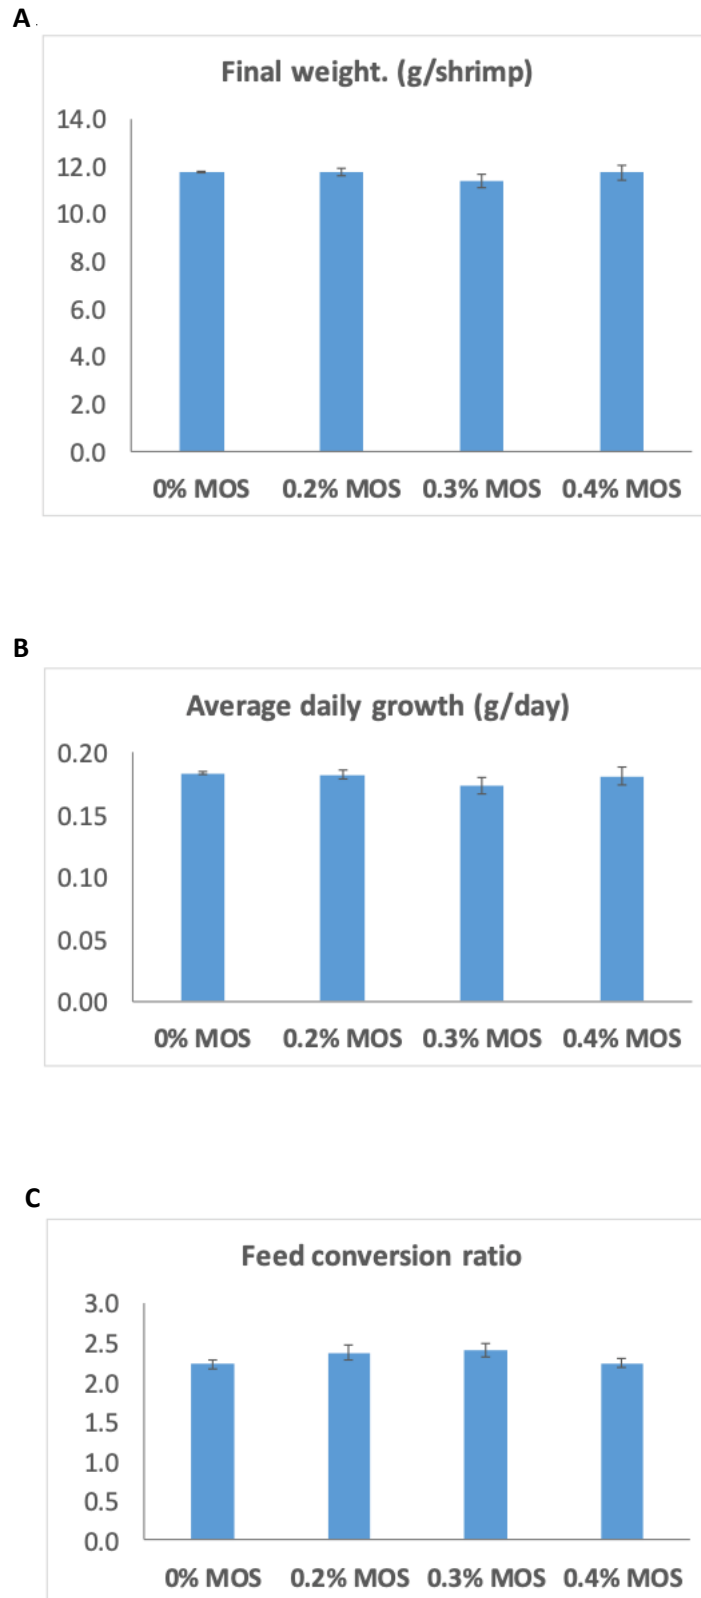

**Figure S3.** Activity analysis of positive colonies stained with Congo red. Positive control was known mannanase producing bacteria. Negative control was non-mannanase producing bacteria, *Escherichia coli*.

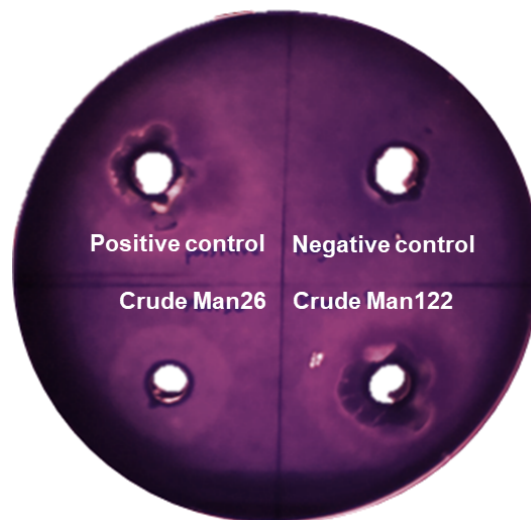

Supplement: s1 [file s1]
